# Supplementary material for: Bioinformatics Analysis of the FREM1 Gene—Evolutionary Development of the IL-1R1 Co-Receptor, TILRR
Source: Biology (Basel). 2012 Sep 25;1(3):484–94. doi: 10.3390/biology1030484 (PMC4009816; doi:10.3390/biology1030484)
Supplement: Supplementary File 1 — PDF-Document (PDF, 667 KB) [file biology-01-00484-s001.pdf]

## **Supporting Information File S1.**

Table of organisms and sequences identified in the study, including information on the genes used and the genome versions studied.

## Supporting Information File S1

### Ensembl Frem1 orthologs

| <u>Organism</u>        | <u>Ensembl Gene</u> | <u>Genome version</u>  | <u>Sequence identified</u> |
|------------------------|---------------------|------------------------|----------------------------|
| Vicugna pacos          | ENSVPAG00000005812  | vicPac1                | MVTREPMLKAALPLFAR          |
| Anolis carolinensis    | ENSACAG00000017780  | AnoCar1.0              | MVKQEHMLKTALPLFAR          |
| Dasyus novemcinctus    | ENSDNOG00000007689  | dasNov2                | corrupt DNA sequence       |
| Otolemur garnettii     | ENSOGAG00000011871  | otoGar1                | MVTQESMLKAALPLFAR          |
| Ciona savignyi         | ENSCSAVG00000001283 | CSAV 2.0               | None identified            |
| Caenorhabditis elegans | C48E7.6             | WS200                  | None identified            |
| Felis catus            | ENSFCAG00000004349  | CAT                    | MVTQDPMLKAALPLFAR          |
| Gallus gallus          | ENSGALG00000005426  | WASHUC2                | MVNQEHMLKTTTLPLFAR         |
| Pan troglodytes        | ENSPTRG00000020782  | CHIMP2.1               | MVTQESMLKAALPLFTR          |
| Ciona intestinalis     | ENSCING00000013358  | JGI 2                  | None identified            |
|                        | ENSCING00000007527  | JGI 2                  | None identified            |
|                        | ENSCING00000004972  | JGI 2                  | None identified            |
| Bos taurus             | ENSBTAT00000026827  | Btau_4.0               | MVTQESMLKAALPLFAR          |
| Canis familiaris       | ENSCAFG00000001537  | CanFam 2.0             | LPLFAR                     |
| Tursiops truncatus     | ENSTTRG00000008037  | turTru1                | MVTQESMLKATLPLFAR          |
| Loxodonta africana     | ENSLAFG00000008954  | Loxafr3.0              | MVKQESMLKAALPLFVR          |
| Takifugu rubripes      | ENSTRUG00000006301  | FUGU 4.0               | MHLSAFGYLFR**              |
| Gorilla gorilla        | ENSGGOG00000014708  | gorGor3                | MVTQESMLKAALPLFTR          |
| Cavia porcellus        | ENSCPOG00000011267  | cavPor3                | MVTQESMLKAALPLFAR          |
| Erinaceus europaeus    | ENSEEUG00000001483  | eriEur1                | MVTQESMLKAALPLFAR          |
| Homo sapiens           | ENSG00000164946     | GRCh37                 | MVTQESMLKAALPLFTR          |
| Equus caballus         | ENSECAG00000015567  | Equ Cab2               | MVTQESMLKAALPLFAR          |
| Procavia capensis      | ENSPCAG00000015286  | proCap1                | MVKQESMLKAALPLFAR          |
| Dipodomys ordii        | ENSDORG00000014455  | dipOrd1                | LVTQESMLKAALPLFAR          |
| Echinops telfairi      | ENSETEG00000015868  | TENREC                 | SMLKAALPLFVR               |
| Macaca mulatta         | ENSMMUG00000008128  | MMUL1.0                | MVTQESMLKAALPLFAR          |
| Callithrix jacchus     | ENSCJAG00000012240  | Callithrix_Jacchus-3.2 | MVTQESMLKAALPLFAR          |

|                                      |                            |                               |                               |
|--------------------------------------|----------------------------|-------------------------------|-------------------------------|
| <b>Oryzias latipes</b>               | <b>ENSORLG00000020663</b>  | HdrR                          | None identified               |
| <b>Pteropus vampyrus</b>             | <b>ENSPVAG00000014241</b>  | pteVam1                       | MVTQESMLKAALPLFAR             |
| <b>Myotis lucifugus</b>              | <b>ENSMLUG00000016591</b>  | myoLuc1                       | MVTQESMLKAALPLFAR             |
| <b>Mus musculus</b>                  | <b>ENSMUSG00000059049</b>  | NCBIM37                       | MGTQEPMMLKAALPLFAR            |
| <b>Microcebus murinus</b>            | <b>ENSMICG00000015934</b>  | micMur1                       | MVTQESMLKAALPLFAR             |
| <b>Monodelphis domestica</b>         | <b>ENSMODG00000014986</b>  | monDom5                       | MVKQASMLKATLPLFAR             |
| <b>Pongo pygmaeus</b>                | <b>ENSPPYG00000019211</b>  | ppYG2                         | MVTQESMLKAALPLFTR             |
| <b>Sus scrofa</b>                    | <b>ENSSSCG00000005187</b>  | Sscrofa9                      | No homologous exon identified |
| <b>Ochotona princeps</b>             | <b>ENSOPRG00000017066</b>  | OchPri2.0                     | MVTQESMLKAALPLFAR             |
| <b>Ornithorhynchus anatinus</b>      | <b>ENSOANG00000022534</b>  | Ornithorhynchus_a natinus-5.0 | No homologous exon identified |
|                                      | <b>ENSOANG00000013004</b>  | Ornithorhynchus_a natinus-5.0 | No homologous exon identified |
|                                      | <b>ENSOANG00000010120</b>  | Ornithorhynchus_a natinus-5.0 | No homologous exon identified |
| <b>Oryctolagus cuniculus</b>         | <b>ENSOCUG00000010379</b>  | oryCun2                       | MVTQESMLKAALPLFAR             |
| <b>Rattus norvegicus</b>             | <b>ENSRNOG00000022309</b>  | RGSC 3.4                      | MGTQEPMMLKTALPLFAR            |
| <b>Sorex araneus</b>                 | <b>ENSSARG00000010446</b>  | sorAra1                       | MVTHESMLKAALPLFAR             |
| <b>Choloepus hoffmanni</b>           | <b>ENSCHOG00000008350</b>  | choHoff1                      | MVKQESMLKAALPLFAR             |
| <b>Spermophilus tridecemlineatus</b> | <b>ENSSTOG00000003243</b>  | speTri1                       | MVTQESMLKAALPLFAR             |
| <b>Gasterosteus aculeatus</b>        | <b>ENSGACG00000000932</b>  | BROAD S1                      | None identified               |
| <b>Tarsius syrichta</b>              | <b>ENSTSYG00000004164</b>  | TarSyr1                       | ARESMLKAPLPLFAR               |
| <b>Tetraodon nigroviridis</b>        | <b>ENSTNIG00000005289</b>  | TETRAODON 8.0                 | None identified               |
| <b>Tupaia belangeri</b>              | <b>ENSTBEG00000013718</b>  | tupBel1                       | MVTPEPMLKAALPLFAR             |
| <b>Macropus eugenii</b>              | <b>ENSMEUG00000012357</b>  | Meug_1.0                      | MVKQASMLKATLPLFAR             |
| <b>Xenopus tropicalis</b>            | <b>ENSXETG00000003300</b>  | JGI4.1                        | MGKQEPMMLKAPLPLFAR            |
|                                      | <b>ENSXETG00000008875</b>  | JGI4.1                        | None identified               |
| <b>Taeniopygia guttata</b>           | <b>ENSTGUG00000004583</b>  | Taeniopygia_guttat a-3.2.4    | MVNREQMLKTALPLFAR             |
| <b>Danio rerio</b>                   | <b>ENSDARG000000069473</b> | Zv7                           | None identified               |

Ensembl Frem1b orthologs

| <b><u>Organism</u></b>        | <b><u>Ensembl Gene</u></b> | <b><u>Genome version</u></b> | <b><u>Sequence identified</u></b> |
|-------------------------------|----------------------------|------------------------------|-----------------------------------|
| <b>Anolis carolinensis</b>    | <b>ENSACAG00000007607</b>  | AnoCar1.0                    | None identified                   |
| <b>Ciona savignyi</b>         | <b>ENSCSAVG00000001283</b> | CSAV 2.0                     | None identified                   |
| <b>Caenorhabditis elegans</b> | <b>C48E7.6</b>             | WS200                        | None identified                   |
| <b>Ciona intestinalis</b>     | <b>ENSCING00000013358</b>  | JGI 2                        | None identified                   |
|                               | <b>ENSCING00000007527</b>  | JGI 2                        | None identified                   |
|                               | <b>ENSCING00000004972</b>  | JGI 2                        | None identified                   |
| <b>Takifugu rubripes</b>      | <b>ENSTRUG00000000642</b>  | FUGU 4.0                     | None identified                   |
| <b>Oryzias latipes</b>        | <b>ENSORLG00000003500</b>  | HdrR                         | None identified                   |
| <b>Gasterosteus aculeatus</b> | <b>ENSGACG00000003138</b>  | BROAD S1                     | None identified                   |
| <b>Tetraodon nigroviridis</b> | <b>ENSTNIG00000002896</b>  | TETRAODON 8.0                | None identified                   |
| <b>Xenopus tropicalis</b>     | <b>ENSXETG00000008875</b>  | JGI4.1                       | None identified                   |
| <b>Danio rerio</b>            | <b>ENSDARG000000062402</b> | Zv8                          | None identified                   |
